# Supplementary material for: Boosting Piezo/Photo-Induced Charge Transfer of CNT/Bi4O5I2 Catalyst for Efficient Ultrasound-Assisted Degradation of Rhodamine B
Source: MDPI journal article supplement (doi:10.3390/ma14164449), 2021-08-09
Supplement: s1 [file s1]

**Supplementary Data**

**for**

**Boosting Piezo/photo-induced Charge Transfer of**

**CNT/Bi<sub>4</sub>O<sub>5</sub>I<sub>2</sub> Catalyst for Efficient Ultrasound-assisted**

**Degradation of Rhodamine B**

Yang Wang <sup>1,†</sup>, Dongfang Yu <sup>2\*,†</sup>, Yue Liu <sup>2</sup>, Xin Liu <sup>2</sup> and Yue Shi <sup>1</sup>

<sup>1</sup> Chang Wang School of Honors, Nanjing University of Information Science and Technology, Nanjing 210044, China; wangyang-cw@nuist.edu.cn (Y.W.); shiyue@nuist.edu.cn (Y.S.)

<sup>2</sup> School of Environmental Science and Engineering, Nanjing University of Information Science and Technology, Nanjing 210044, China; liuy@nuist.edu.cn (Y.L.); lx@nuist.edu.cn (X.L.)

\* Correspondence: yudongfang@nuist.edu.cn

† These authors contributed equally to this work.

**Figures**

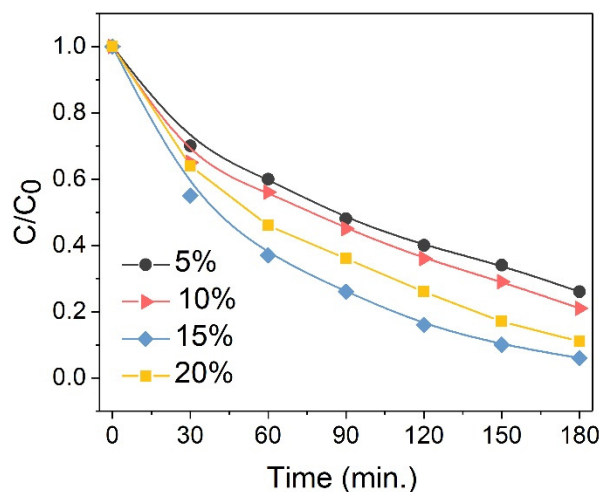

**Figure S1** Piezocatalytic performances of CNT/Bi<sub>4</sub>O<sub>5</sub>I<sub>2</sub> composites (5%, 10%, 15%, 20%) on the degradation of RhB.
